5. Yeager MP, Glass DD, Neff RK, Brinck-Johnson T: Epidural anesthesia and analgesia in high-risk surgical patients. *ANESTHESIOLOGY* 66:729-736, 1987
6. Gieraerts R, Navalgund A, Vaes L, Soetens M, Chang J-L, Jahr

J: Increased incidence of itching and herpes simplex in patients given epidural morphine after cesarean section. *Anesth Analg* 66:1321-1324, 1987

(Accepted for publication June 8, 1988.)

Anesthesiology  
69:633, 1988

*In Reply:*—While it is true that the continuous epidural infusion of opiates may avoid some of the side effects associated with bolus epidural administration, as used in our study, the former technique requires the continuous presence of or availability of skilled nursing care. The newer modalities of postoperative analgesia should be available to all patients and not necessarily those requiring an intensive care setting. The purpose of the study was not to downplay the role of epidural opiates but to compare these different forms of postoperative analgesia out of the ICU setting on healthy patients who, after all, constitute the majority of patients undergoing elective surgery. In such patients, the same degree of specialized nursing is not necessarily available and analgesic efficacy, together with simplicity of technique, need to be balanced against patient safety and nursing acceptance.

In this setting, both Eisenach *et al.*<sup>1</sup> and our group<sup>2</sup> found patient satisfaction to be an important consideration when comparing these techniques. Dr. Hord should not make the mistake of overinterpreting our conclusions to reflect the needs of critically ill patients, but to

represent the application of these newer approaches to analgesia out of the ICU in a very different patient population.

DEBORAH M. HARRISON, M.D.  
Department of Anesthesiology  
Danbury Hospital  
Danbury, Connecticut 06810

#### REFERENCES

1. Eisenach JC, Grice SC, Dewan DM: Patient-controlled analgesia following cesarean section: A comparison with epidural and intramuscular narcotics. *ANESTHESIOLOGY* 68:444-448, 1988
2. Harrison DM, Sinatra R, Morgese L, Chung JH: Epidural narcotic and patient-controlled analgesia for post cesarean section pain relief. *ANESTHESIOLOGY* 68:454-457, 1988

(Accepted for publication June 8, 1988.)

Anesthesiology  
69:633-634, 1988

### Blind Nasal Intubation of an Apneic Neonate

*To the Editor:*—The recent correspondence from Gouverneur<sup>1</sup> prompts me to describe another approach to tracheal intubation of infants.

I was asked to assist in the intubation of the trachea in a 7-week-old, 2-kg infant having severe apneic episodes. A diagnosis of trisomy 13 (Patau Syndrome) had been made, but this was not known by the staff involved in resuscitation. Micrognathia was obvious and laryngoscopy revealed only the proximal epiglottis but not the glottis.

A pediatric malleable metal stylet was employed to curve the 2.5-mm ID Portex endotracheal tube into a suitable shape and, while observing the anterior neck, blind nasal tracheal intubation was successful at the first attempt.

Other reported approaches to overcoming difficult tracheal intubation in neonates include conventional blind nasal tracheal intubation,<sup>2</sup> blind nasal tracheal intubation with the patient in the prone position,<sup>3</sup> anterior commissure laryngoscope with optical stylet,<sup>4</sup> nasopharyngeal intubation,<sup>5</sup> tracheostomy,<sup>6</sup> and fiberoptic endoscopy.<sup>7</sup> Although Berry<sup>8</sup> has stated the age range for using the stylet in blind nasotracheal intubation to be "from three years through adult," I have since 1981 used the technique in 14 younger patients, including five infants of 2.9-4.3 kg body weight (two were stillborn).

The small size endotracheal tubes are rather soft and floppy and very little "feel," necessary for blind tracheal intubation, is transmitted up the tube. In addition, they do not, in contrast to adult sizes, maintain a suitable distal curve. Therefore, a lubricated malleable metal stylet (fig. 1) is used to provide the latter, but without protruding from the end of the tube. It also enables the tube to be manipulated in a way not possible without it. I shape the tube roughly to a right angle with the limbs approximating the respective lengths of nasal passage and

pharynx. Subsequent adjustments to the curvature, *i.e.*, more obtuse or acute, and distal limb length are made in the light of experience at each attempt until tracheal intubation is obtained. To locate the glottis, either the breath sounds, preferable in the young, or the external visual signs described by Jacoby<sup>9</sup> and Bennett *et al.*<sup>\*</sup> may be used.

In contrast to Berry, I have not found it necessary when using the stylet, for any age of patient, to have "a short sharper angle at the tip."<sup>8</sup> The anterior angulation required to enter the larynx can be obtained by manipulation of the stylet supported tube.

The same method can be similarly applied when blind oral tracheal intubation is indicated.

R. WILLIAMSON, BSC., MB. CHB., F.F.A.R.C.S.  
Senior Specialist/Senior Lecturer (Anaesthetics)  
Department of Anaesthetics  
University of Natal  
Box 17039  
Congella 4013  
Durban, South Africa

#### REFERENCES

1. Gouverneur J-M: Using an ureteral catheter as a guide in difficult neonatal fiberoptic intubation. *ANESTHESIOLOGY* 66:436-437, 1987
2. Brechner VL: Unusual problems in the management of airways.

\* Bennett EJ, Grundy EM, Patel KP: Visual signs in blind nasal intubation a new technique *Anesthesiology Review* 5; 18-20, 1978

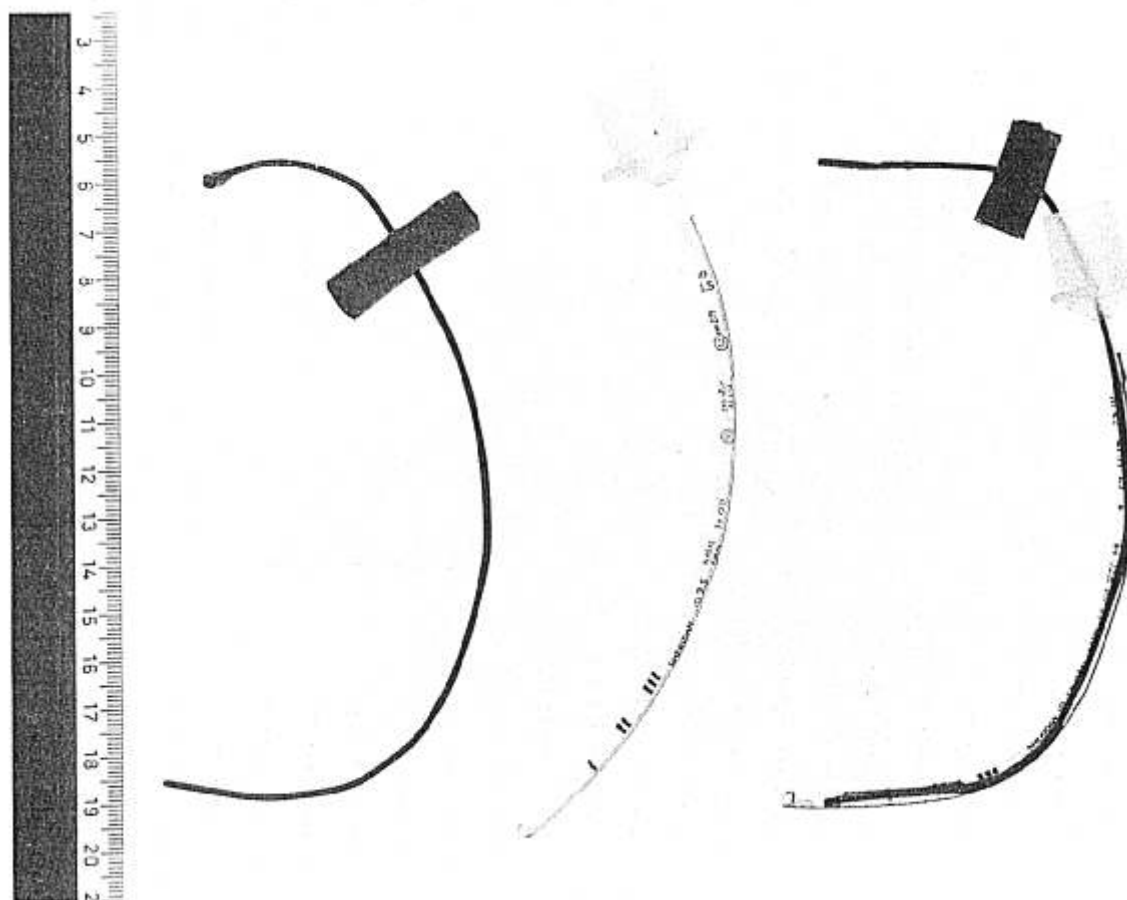

FIG. 1. On the left, a pediatric malleable metal stylet. In the center, a 2.5 mm ID Portex endotracheal tube. On the right, a stylet curved tube used in blind nasal tracheal intubation of a 2.9-kg stillborn infant at the first attempt.

1. Flexion-extension mobility of the vertebrae. *Anesth Analg* 47:362-373, 1968
3. Populaire C, Lundi JN, Pinaud M, Souron R: Elective tracheal intubation in the prone position for a neonate with Pierre Robin syndrome. *ANESTHESIOLOGY* 62:214-215, 1985
4. Handler SD, Keon TP: Difficult laryngoscopy/intubation: The child with mandibular hypoplasia. *Ann Otol Rhinol Laryngol* 92:401-404, 1983
5. Seraj MA, Yousif M, Channa AB: Anaesthetic management of congenital fusion of the jaws in a neonate. *Anaesthesia* 39:695-698, 1984
6. Snijman PC, Prinsloo JG: Congenital fusion of the gums. *Am J Dis Child* 112:593-595, 1966
7. Alfery DD, Ward CF, Harwood IR, Manning FL: Airway management for a neonate with congenital fusion of the jaws. *ANESTHESIOLOGY* 51:340-342, 1979
8. Berry FA: The use of a stylet in blind nasotracheal intubation. *ANESTHESIOLOGY* 61:469-471, 1984
9. Jacoby J: Nasal endotracheal intubation by an external visual technique. *Anesth Analg* 49:731-739, 1970

(Accepted for publication June 8, 1988.)

Anesthesiology  
69:634-635, 1988

## A Unique Complication of a Lumbar Epidural Catheter

*To the Editor:*—In a recent case, our obstetrical anesthesiology team found removal of a 20-gauge, 36-inch Arrow E-C 5000 Theracath epidural catheter, after cesarian section, difficult. The tip of a 17-gauge Touhy needle had been inserted into the L-2/L-3 interspace. After identification of the epidural space, the catheter was easily threaded 2 cm. Following a test dose, surgical anesthesia to T-4 was readily achieved with 18 ml of 0.5% bupivacaine.

After completion of the surgery, the patient was positioned in a left lateral decubitus position with 40° of flexion for epidural catheter removal. Despite steady traction on the catheter, it could not be withdrawn. After assessing that the catheter had been sufficiently withdrawn to place it outside the epidural space, constant perpendicular force on the catheter was applied. After a distinct pop, the catheter was removed intact from beneath the skin. Examination of the retrieved catheter
